# Supplementary material
Source: PubMed Central journal article supplement (PMC7446948)
Supplement: NIHMS1509006-supplement-Supplement.pdf [file NIHMS1509006-supplement-Supplement.pdf]

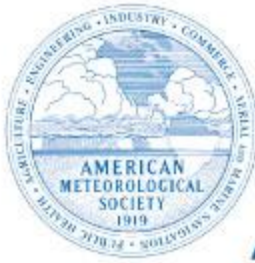

# AMS

American Meteorological Society

## Supplemental Material

*Journal of Hydrometeorology*

A Water Balance–Based, Spatiotemporal Evaluation of Terrestrial Evapotranspiration Products  
across the Contiguous United States

<https://doi.org/10.1175/JHM-D-17-0186.s1>

[© Copyright 2018 American Meteorological Society](#)

Permission to use figures, tables, and brief excerpts from this work in scientific and educational works is hereby granted provided that the source is acknowledged. Any use of material in this work that is determined to be “fair use” under Section 107 of the U.S. Copyright Act or that satisfies the conditions specified in Section 108 of the U.S. Copyright Act (17 USC §108) does not require the AMS’s permission. Republication, systematic reproduction, posting in electronic form, such as on a website or in a searchable database, or other uses of this material, except as exempted by the above statement, requires written permission or a license from the AMS. All AMS journals and monograph publications are registered with the Copyright Clearance Center (<http://www.copyright.com>). Questions about permission to use materials for which AMS holds the copyright can also be directed to [permissions@ametsoc.org](mailto:permissions@ametsoc.org). Additional details are provided in the AMS Copyright Policy statement, available on the AMS website (<http://www.ametsoc.org/CopyrightInformation>).

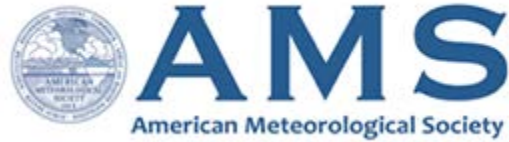

*Journal of Hydrometeorology*

Supplemental Material for:

**A water balance based, spatiotemporal evaluation of terrestrial evapotranspiration products across the contiguous United States**

Elizabeth Carter<sup>1\*</sup>, Christopher Hain<sup>2</sup>, Martha Anderson<sup>3</sup>, Scott Steinschneider<sup>4</sup>

1. PhD Candidate, Department of Biological and Environmental Engineering, Cornell University, 111 Wing Drive, Riley-Robb Hall, Ithaca, NY, 14853. Email: [ekc76@cornell.edu](mailto:ekc76@cornell.edu)

2. Research Scientist, NASA Short-term Prediction Research and Transition Center, 320 Sparkman Drive, Huntsville, AL 35805. Email: [christopher.hain@nasa.gov](mailto:christopher.hain@nasa.gov)

3. Research Physical Scientist, USDA-ARS Hydrology and Remote Sensing Laboratory, 104 Building 007, BARC-West, Beltsville, MD 20705. Email: [Martha.Anderson@ars.usda.gov](mailto:Martha.Anderson@ars.usda.gov)

2. Assistant Professor, Department of Biological and Environmental Engineering, Cornell University, 111 Wing Drive, Riley-Robb Hall, Ithaca, NY, 14853. Email: [ss3378@cornell.edu](mailto:ss3378@cornell.edu),  
Phone: 607-255-2155

\*corresponding author

## **Introduction**

The figures and text contained in this document are intended to support the methods, results, and conclusions from Carter et al. (2018). Information enclosed includes Supplemental Text 1-3 and Supplemental Figures S1-S9.

### ***Supplemental Text 1: Calculation of GRACE Total Water Storage (TWS)***

In 2002, the Gravity Recovery and Climate Experiment (GRACE), a partnership between NASA and the German Aerospace Center, launched a pair of satellites to measure small-scale changes in Earth's gravitational field. Observations from the GRACE satellites have been used to estimate monthly TWS changes globally. Two methods for converting GRACE data into  $\Delta TWS$  estimates were evaluated in this study: GRACE Tellus (Swenson 2012) and GRACE Mascon (Wiese 2016, Save et al. 2016).

GRACE Tellus ( $\Delta TWS_T$ ): Three estimates of monthly total water storage estimates, independently derived from GRACE data by the Center for Space Research at University of Texas, Austin; the Jet Propulsion Laboratory; and the Geoforschungs Zentrum Potsdam, were downloaded from the JPL website ([ftp://podaac-ftp.jpl.nasa.gov/allData/tellus/L3/land\\_mass/RL05/netcdf/](ftp://podaac-ftp.jpl.nasa.gov/allData/tellus/L3/land_mass/RL05/netcdf/)), averaged, and then multiplied by the scaling grid as described in Landerer and Swenson (2012). Water year  $\Delta TWS_T$  is approximated by taking the mean September and October TWS anomaly for year  $t$  in 2003-2015 and subtracting the mean September and October TWS anomaly for year  $t - 1$ . The mean  $\Delta TWS$  for each year was calculated for each basin. We note that many basins were smaller than the minimum spatial resolution of the GRACE Tellus product, and were assigned values for  $\Delta TWS_T$  based on the grid cell in which they fell.

***Carter E and Steinschneider S, (2018). A water balance based, spatiotemporal evaluation of terrestrial evapotranspiration products across the contiguous United States: Supplemental Material***

GRACE MASCON ( $\Delta TWS_M$ ): The Jet Propulsion Lab has developed a total water storage change anomaly product based on Mass Concentration block (“mascon”) functions, instead of spherical harmonics. The GRACE Mascon approach allows for easy implementation of geophysical constraints to filter out noise in GRACE observations.  $\frac{1}{2}$  degree GRACE Mascon surface TWS anomaly grids with the Coastline Resolution Improvement filter were downloaded from the JPL website (<ftp://podaac.jpl.nasa.gov/allData/tellus/L3/mascon/RL05/JPL/CRI/netcdf/>). The provided  $\frac{1}{2}$  degree scaling grid was multiplied by the GRACE Mascon layers.  $\Delta TWS_M$  was calculated from the monthly scaled GRACE Mascon grids as described for GRACE Tellus data. While GRACE Mascon data is at a higher spatial resolution than the GRACE Tellus data, we note that the majority of our basins were still below the minimum resolution for GRACE Mascon data, and were assigned  $\Delta TWS$  values similarly to the Tellus data.

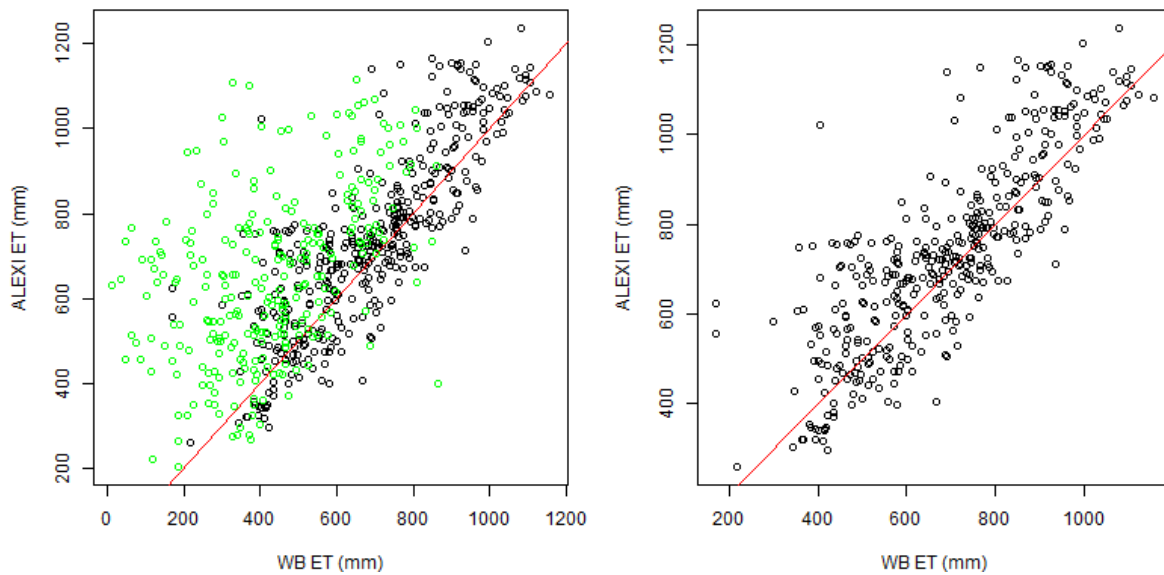

Figure S1: Scatterplot of  $\overline{ET_{EB}^{ALEXI}}$  and  $\overline{ET_{WB}}$  with a 1:1 relationship drawn in red. Left: basins with average slopes greater than 15% are highlighted in green. Right: basins with average slopes greater than 15% are removed from the scatter.

### **Supplemental Text 2: $\overline{ET_{WB}}$ calculated from multiple P datasets**

In the main text, we argue that it would be unlikely that long-term error in orographically-adjusted basin-averaged P would be biased in the same direction across all 671 basins considered in this study, and if such systematic bias did exist, it would most likely be caused by one of two plausible reasons: 1) well-documented undercatch of gage precipitation linked to surface winds (Adam and Lettenmaier 2003, Yang et al. 2005), or 2) potential systematic errors in data processing. The first source of bias would lead to a systematic underestimation of true basin-averaged P, while the second source of bias could lead to either positive or negative systematic errors. If undercatch were the only source of systematic bias across all gages, then we can

**Carter E and Steinschneider S, (2018). A water balance based, spatiotemporal evaluation of terrestrial evapotranspiration products across the contiguous United States: Supplemental Material**

assume that accurate  $ET_{EB}$  products would produce long-term ET estimates near or slightly above  $ET_{WB}$  estimates on average. This conclusion requires that we eliminate the possibility of data processing errors as another source of systematic bias. To do this,  $\overline{ET_{WB}}$  is re-calculated with several different precipitation datasets that would have different processing procedures: NLDAS-2 Secondary Forcing dataset P ( $\overline{ET_{WB}^{NLDAS-B}}$ , Xia et al. 2012), Global Precipitation Climatology Centre (GPCC) P ( $\overline{ET_{WB}^{GPCC}}$ , Schneider et al. 2011), and P data for the 1/8 degree gridded observed meteorological dataset published by Maurer et al. (2002) and distributed at <http://www.engr.scu.edu/~emaurer/data.shtml> ( $\overline{ET_{WB}^{Maurer}}$ ). These  $\overline{ET_{WB}}$  estimates are compared to  $\overline{ET_{EB}}$  products in Figure S2. While there are fundamental differences in how these respective P datasets were constructed, and therefore it is unlikely they would share similar processing errors, we note that there is significant overlap in rain gage data and/or radar data used in the datasets. Therefore, it cannot be assumed that the datasets have independent error due to issues like undercatch. The only exception is  $\overline{ET_{WB}^{NLDAS-B}}$ , which is a reanalysis-based precipitation product and therefore would have its own unique set of systematic errors that differ from gage-based products.

When comparing the different  $\overline{ET_{WB}}$  estimates to the different  $\overline{ET_{EB}}$  products, similar relationships and systematic biases are seen for the gage-based NLDAS-2A, GPCC, and Maurer datasets, while a different set of systematic errors are seen for the reanalysis-based NLDAS-2B P data. This indicates that processing error in the NLDAS primary precipitation forcing data that is unique from the other gaged products is unlikely to contribute to the systematic biases seen with the different  $\overline{ET_{EB}}$  estimates. Rather, any systematic bias in gaged-based  $\overline{ET_{WB}}$  is likely linked

**Carter E and Steinschneider S, (2018). A water balance based, spatiotemporal evaluation of terrestrial evapotranspiration products across the contiguous United States: Supplemental Material**

to undercatch, which would explain the different bias seen for the NLDAS-2B reanalysis-based P dataset. Based on these results, we conclude that the NOAA  $\overline{ET_{EB}^{NOAH}}$  estimates likely exhibit a moderate negative bias compared to the true long-term ET across the CONUS.

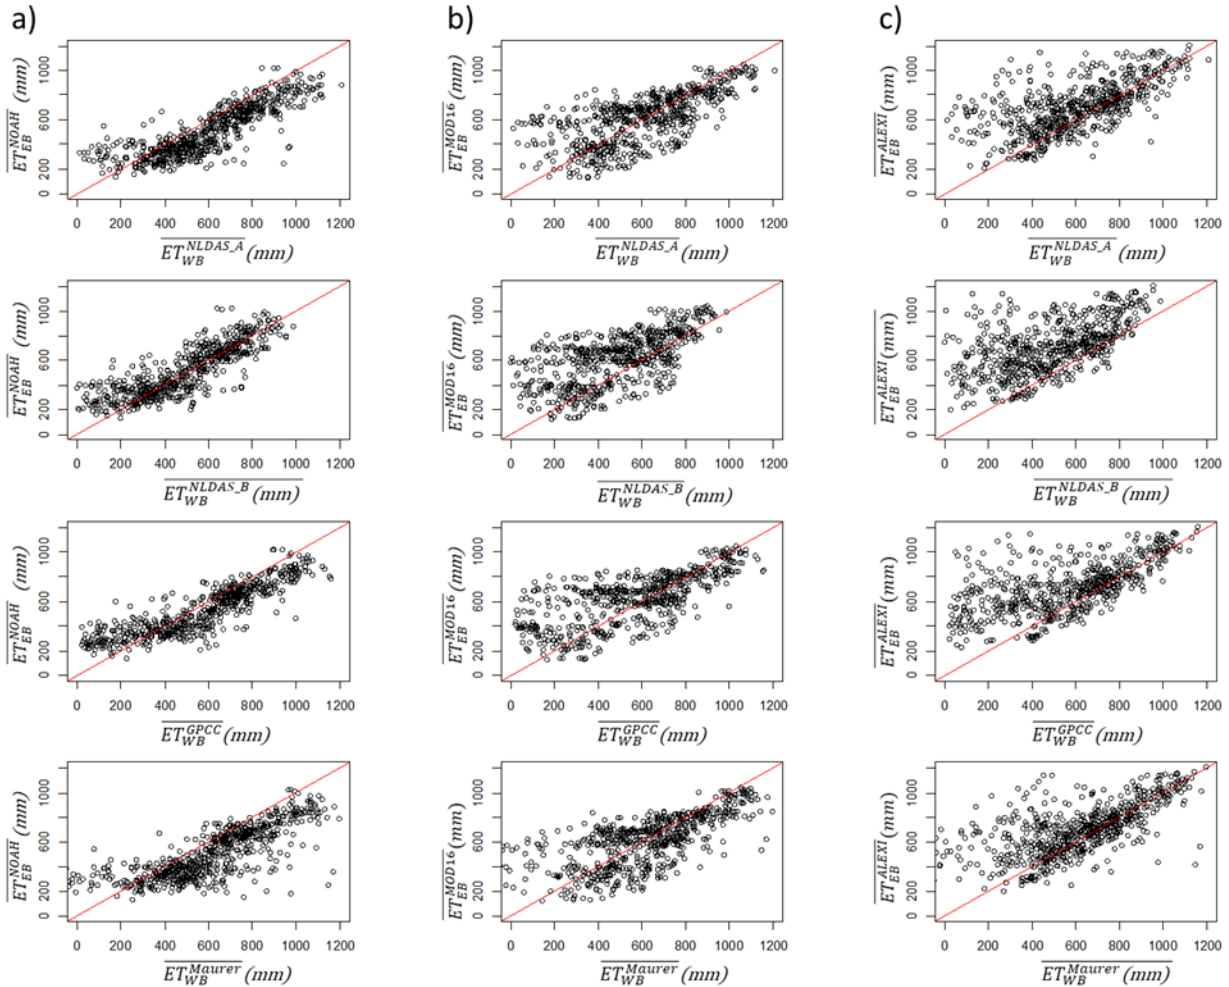

Figure S2: Scatterplot of a)  $\overline{ET_{EB}^{NOAH}}$ , b)  $\overline{ET_{EB}^{MOD16}}$ , c)  $\overline{ET_{EB}^{ALEXI}}$  against  $\overline{ET_{WB}^{NLDAS\_A}}$  (as is used in main text, first row),  $\overline{ET_{WB}^{NLDAS\_B}}$  (second row),  $\overline{ET_{WB}^{GPCC}}$  (third row), and  $\overline{ET_{WB}^{Maurer}}$  (fourth row).

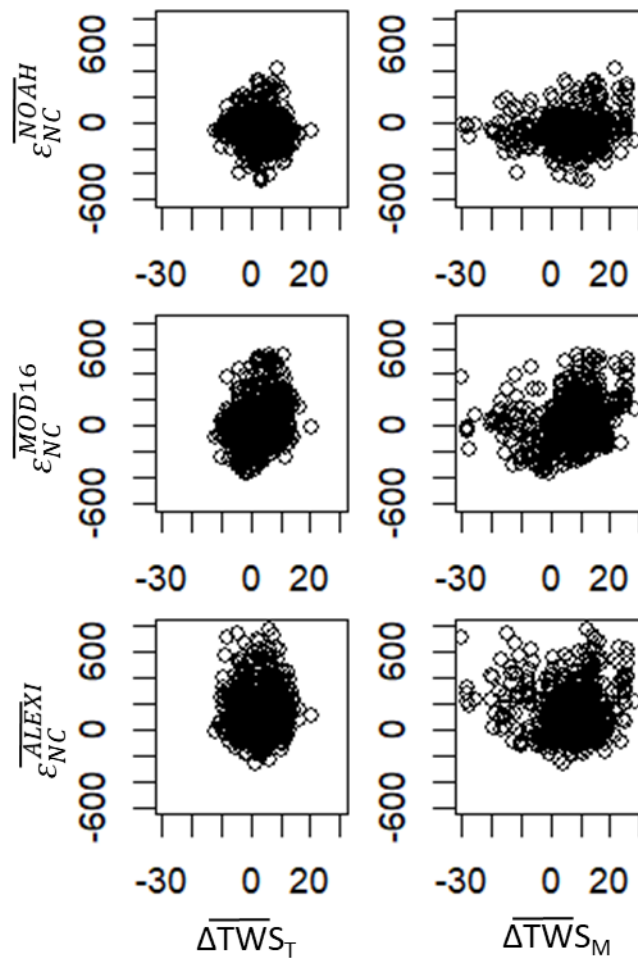

Figure S3: Scatterplot of  $\overline{\varepsilon_{NC}^{NOAH}}$  (mm, top),  $\overline{\varepsilon_{NC}^{MOD16}}$  (mm, center), and  $\overline{\varepsilon_{NC}^{ALEXI}}$  (mm, bottom) against  $\overline{\Delta TWS_T}$  (mm, left) and  $\overline{\Delta TWS_M}$  (mm, right).



**Carter E and Steinschneider S, (2018). A water balance based, spatiotemporal evaluation of terrestrial evapotranspiration products across the contiguous United States: Supplemental Material**

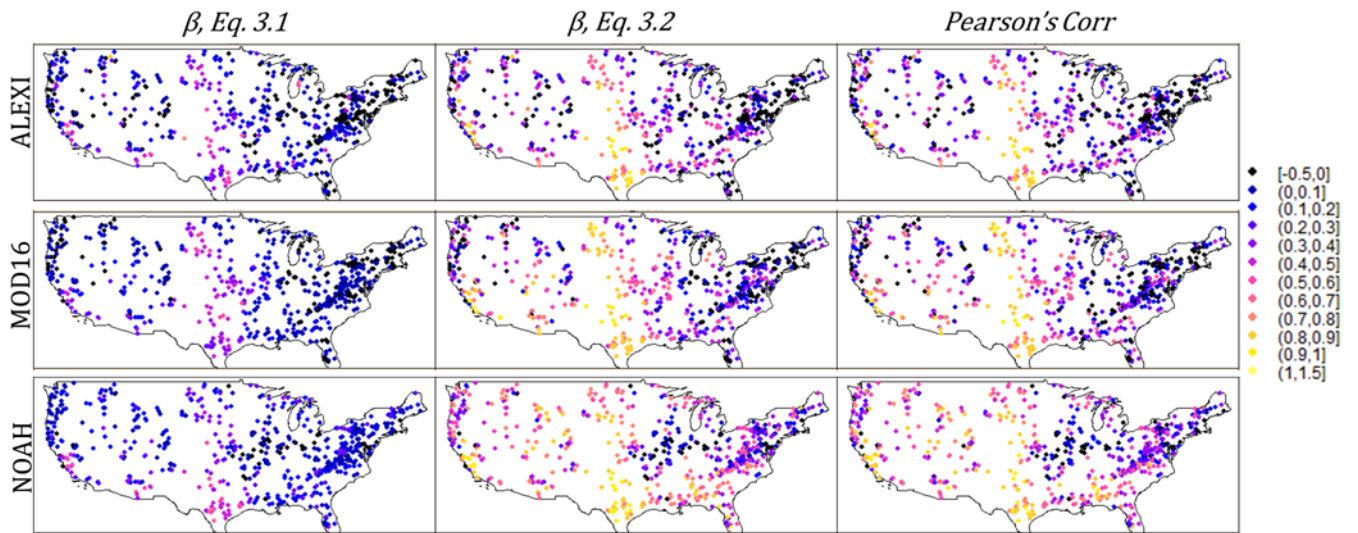

Figure S4:  $\beta$  values for Equation 3.1 calculated by basin (left column),  $\beta$  values for Equation 3.2 calculated by basin (center column), and Pearson's correlation coefficients relating  $ET_{EB}$  to  $ET_{WB}$  calculated at by basin (right column). Spatial patterns shown here confirm the results of the GWR coefficients in Figure 4.

**Carter E and Steinschneider S, (2018). A water balance based, spatiotemporal evaluation of terrestrial evapotranspiration products across the contiguous United States: Supplemental Material**

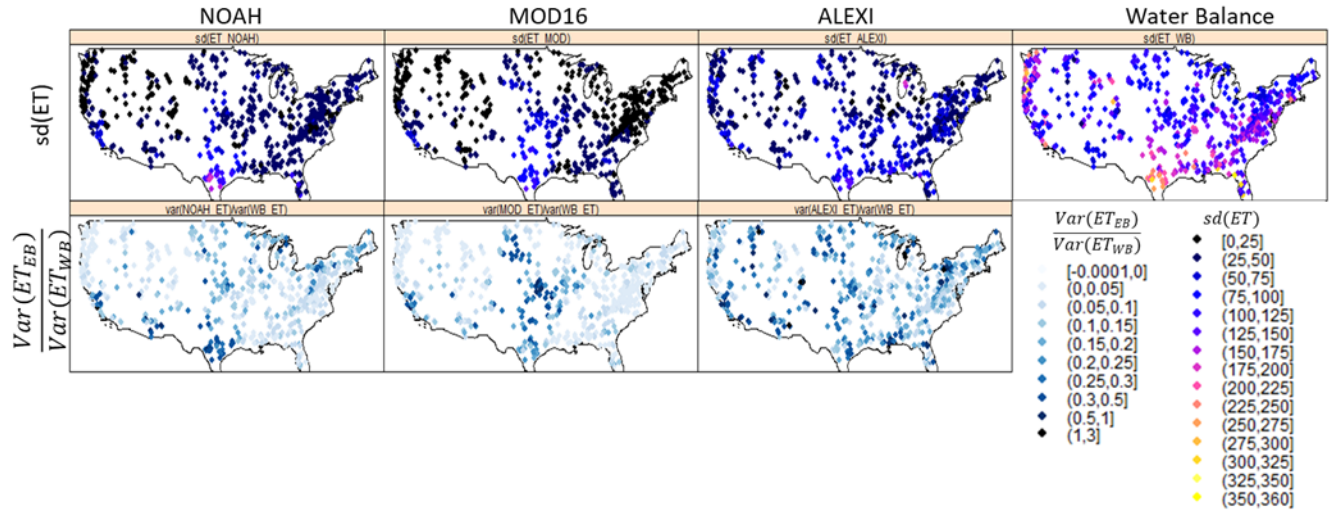

Figure S5: Standard deviations (top) of basin-level annual ET estimates from NOAH, MOD16, ALEXI, and WB. Variance ratios (bottom) between  $ET_{EB}$  and  $ET_{WB}$ .

Carter E and Steinschneider S, (2018). A water balance based, spatiotemporal evaluation of terrestrial evapotranspiration products across the contiguous United States: Supplemental Material

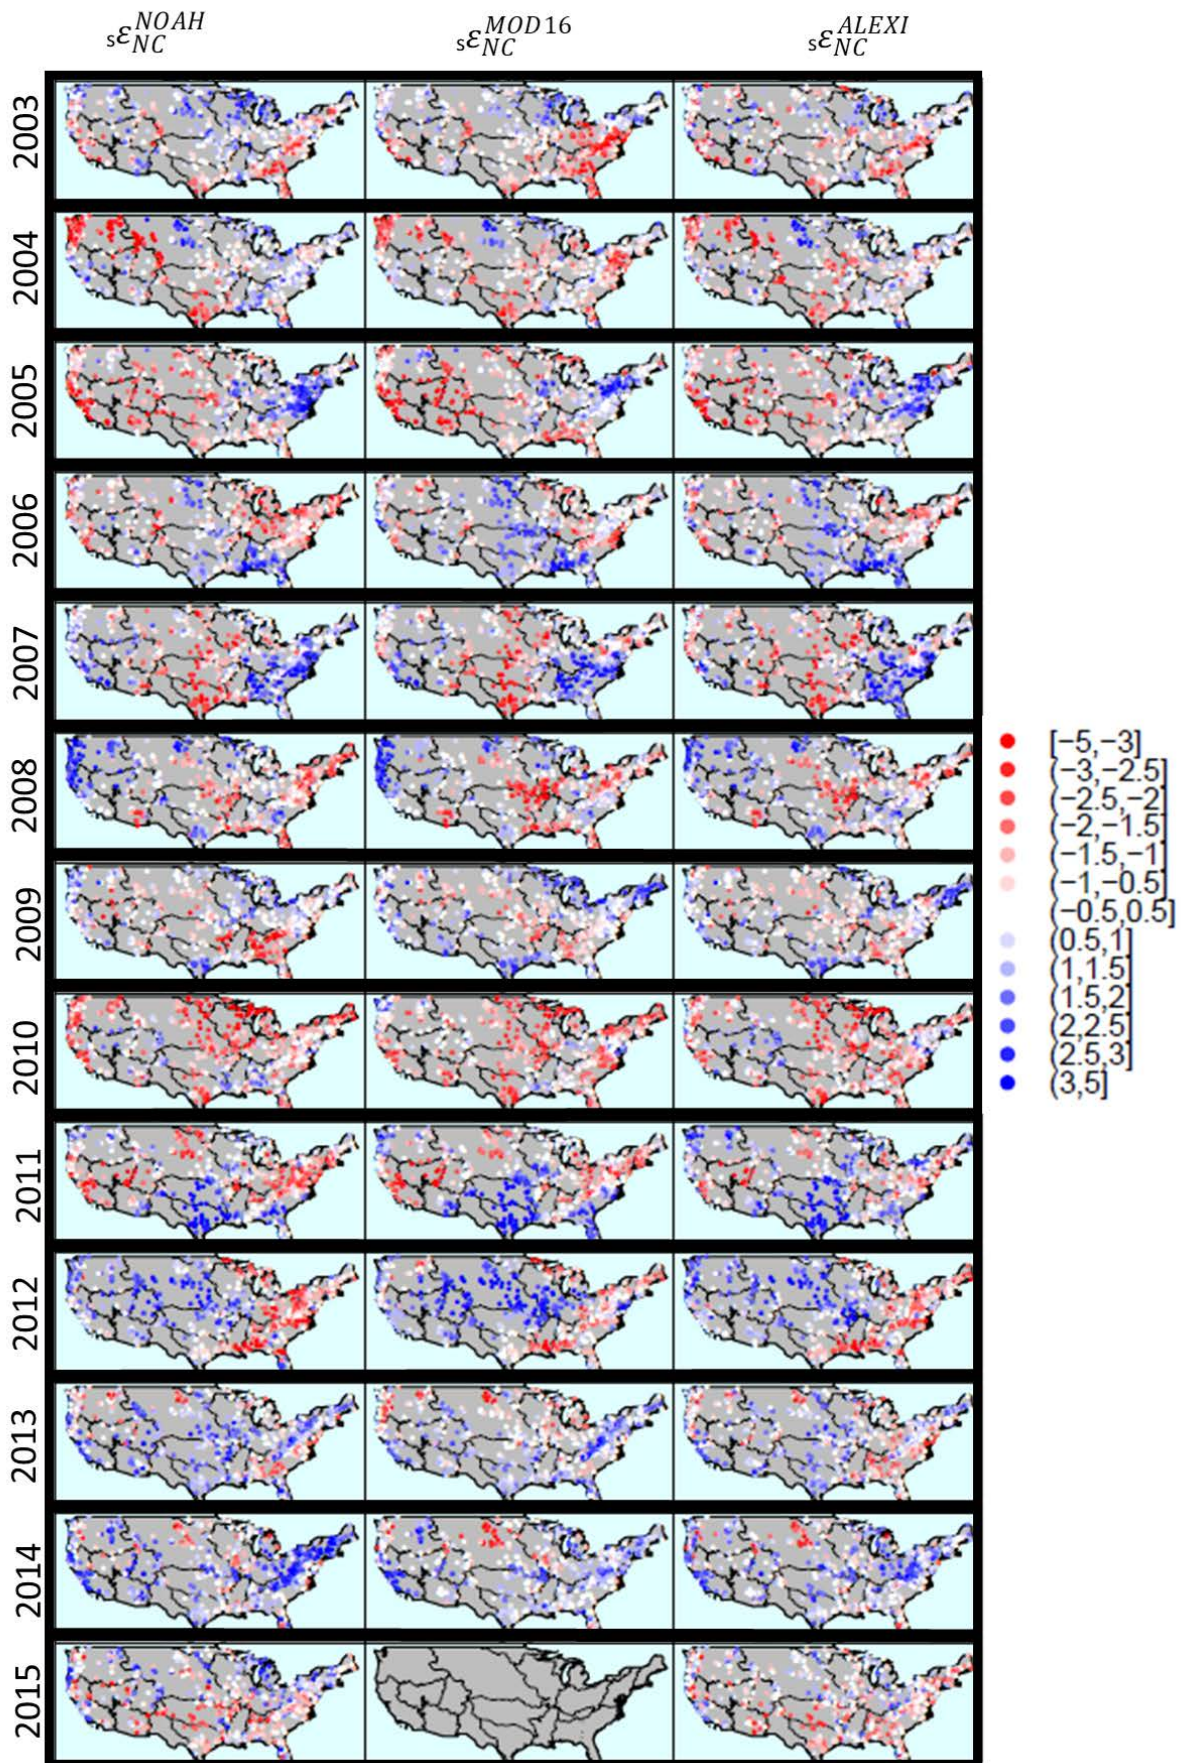

***Carter E and Steinschneider S, (2018). A water balance based, spatiotemporal evaluation of terrestrial evapotranspiration products across the contiguous United States: Supplemental Material***

Figure S6: Maps of  $s\epsilon_{NC}^{NOAH}$  (left),  $s\epsilon_{NC}^{MOD16}$  (middle),  $s\epsilon_{NC}^{ALEXI}$  (right) for each water year between 2003-2015. Spatial clustering of annual  $s\epsilon_{NC}$ , specifically in the Eastern US and Pacific Northwest, are consistent with what would be expected if weather/circulation anomalies were driving discrepancies between energy balance and terrestrial water balance models.

***Supplemental Text 3: GW Regression of  $\epsilon_{NC}$  and GRACE  $\Delta TWS_M$***

Figure S7 demonstrates that  $\epsilon_{NC}$  shows a weak, direct relationship to both  $\Delta TWS_{Tellus}$  (left) and  $\Delta TWS_{Mascon}$  (right), with a slightly stronger relationship to the Mascon data. If  $\Delta TWS_{Tellus}$  or  $\Delta TWS_{Mascon}$  are included directly into the water balance estimate of ET and scaled non-closure errors re-examined (Figure S8 and Figure S9), improvements can be seen in some regions and years, but errors can actually get larger in other areas or years. A similar result is seen if the errors are unscaled (not shown), and is not surprising giving the weak relationship in Figure S7. However, this approach of directly including GRACE  $\Delta TWS$  into the water balance calculation may reduce the information content of the  $\Delta TWS$  data, particularly if there is any variance bias in the GRACE  $\Delta TWS$  estimates. If this were the case, then directly including  $\Delta TWS$  as a term in the water balance could lead to additional error in the estimate of  $ET_{WB}$ , masking the importance of the true  $\Delta TWS$  to the true  $ET_{WB}$ . This problem might be compounded if there were also variance bias in basin-averaged P. Therefore, to control for the potential variance biases in both  $\Delta TWS$  and basin-averaged P, we prefer to examine the correlations between  $\Delta TWS$  and the scaled non-closure errors, as shown in Figure 6 of the main text.

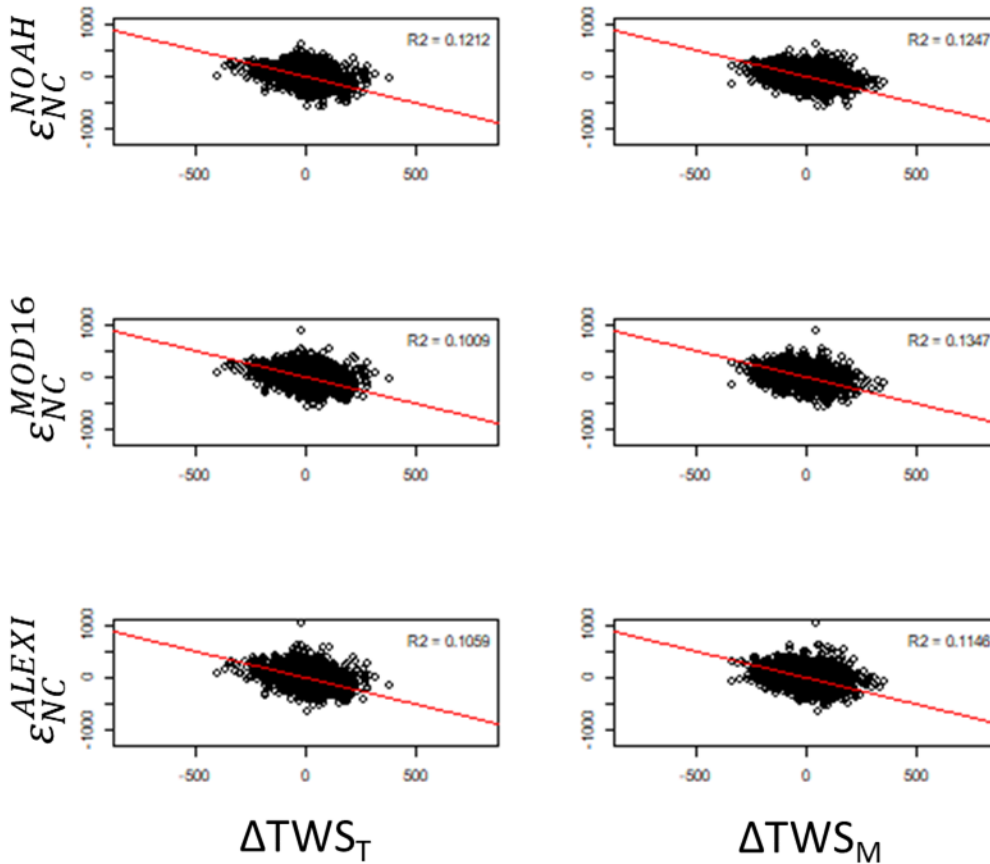

Figure S7: Scatterplot of annual non-closure error ( $\epsilon_{NC}$ , in mm) for NOAH (top), MOD16 (middle), and ALEXI (bottom) compared to  $\Delta TWS_T$  (left, in mm) and  $\Delta TWS_M$  (right, in mm). Each point in the scatter represents a station/year. As  $\Delta TWS_M$  showed slightly higher  $R^2$  in comparison to  $\Delta TWS_T$ , and as  $\Delta TWS_M$  demonstrated an inter-annual range closer to the inter-annual ranges of  $\epsilon_{NC}$ , it was selected for analysis

Carter E and Steinschneider S, (2018). A water balance based, spatiotemporal evaluation of terrestrial evapotranspiration products across the contiguous United States: Supplemental Material

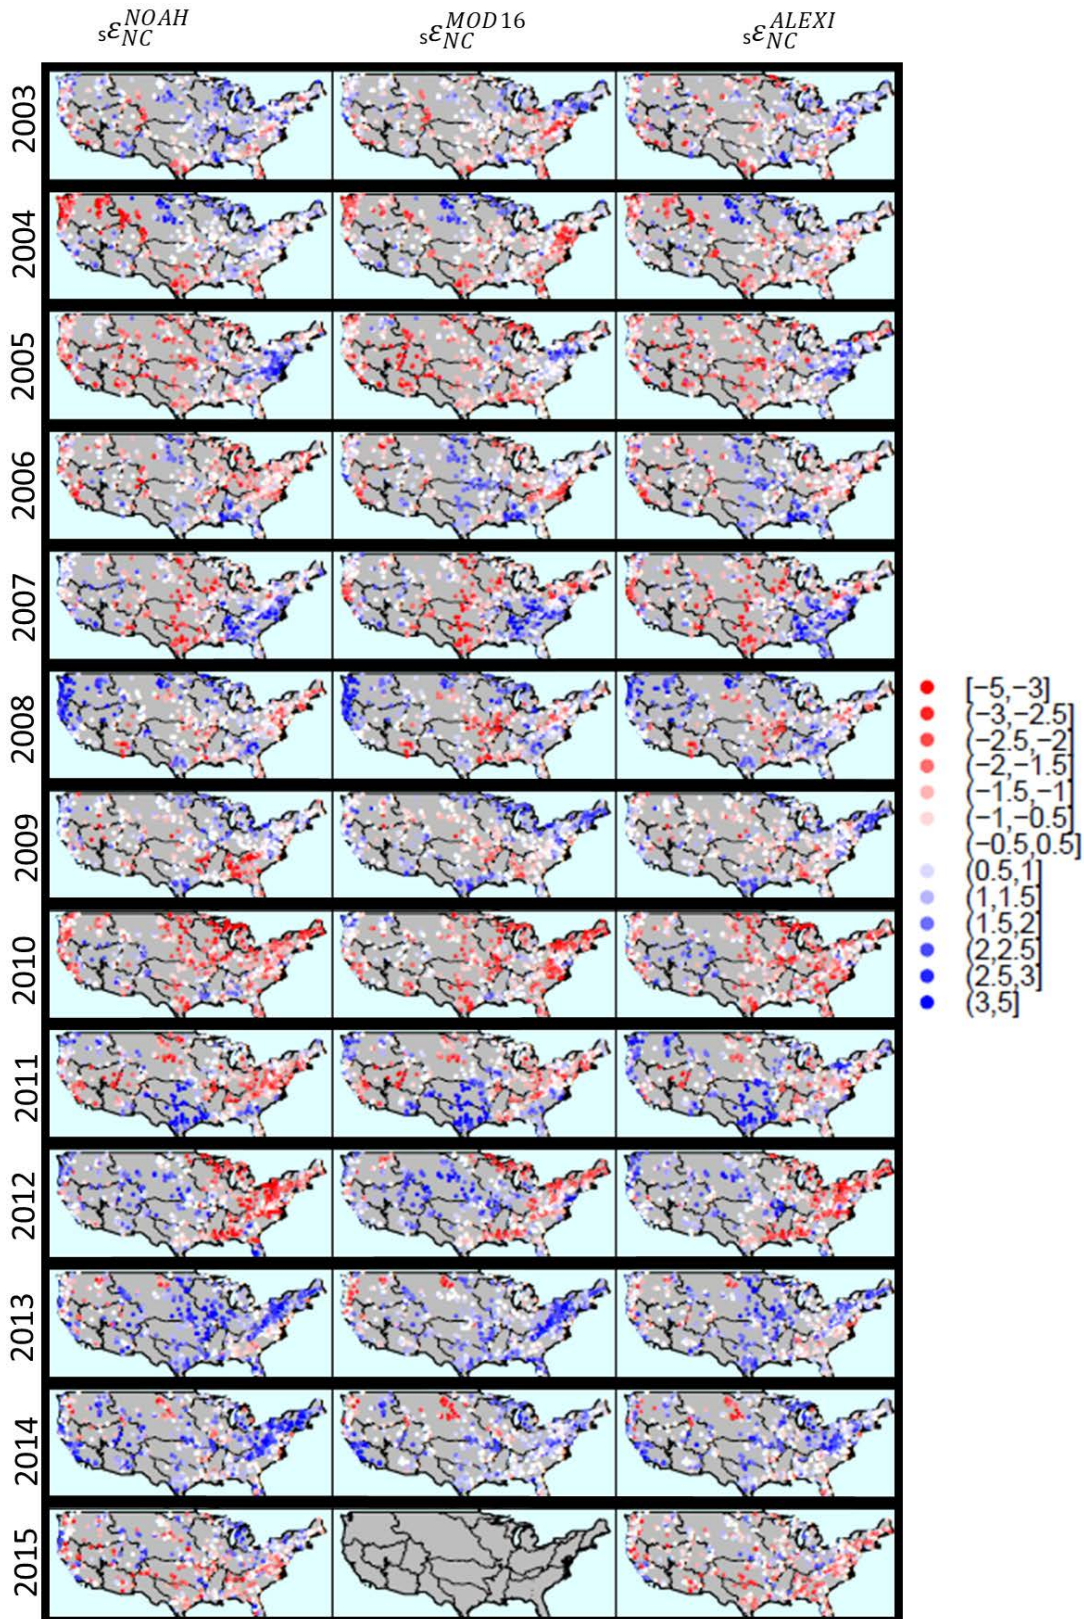

Figure S8: As in Figure S6, where  $s\epsilon_{NC}$  is calculated from  $ET_{WB} - \Delta TWS_{Tellus}$ .

Carter E and Steinschneider S, (2018). A water balance based, spatiotemporal evaluation of terrestrial evapotranspiration products across the contiguous United States: Supplemental Material

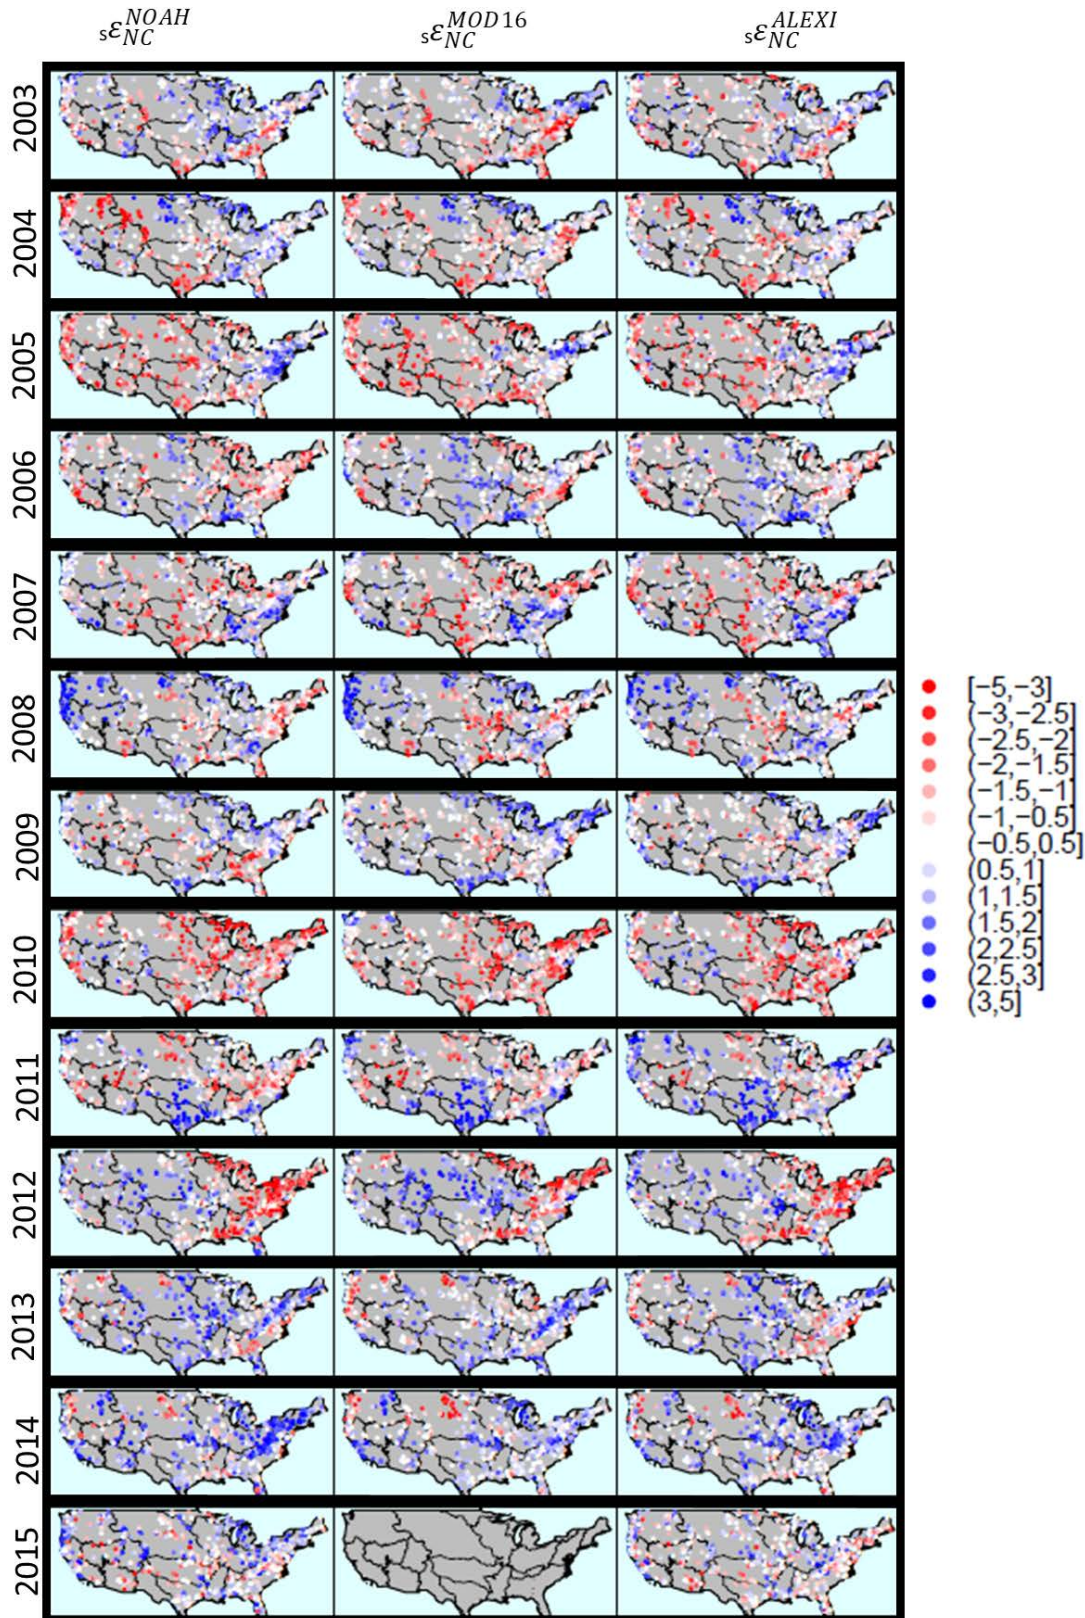

Figure S9: As in Figure S6, where  $s\epsilon_{NC}$  is calculated from  $ET_{WB} - \Delta TWS_{Mascon}$

**Carter E and Steinschneider S, (2018). A water balance based, spatiotemporal evaluation of terrestrial evapotranspiration products across the contiguous United States: Supplemental Material**

**Supplemental References:**

- Landerer, F. W., & Swenson, S. C. (2012). Accuracy of scaled GRACE terrestrial water storage estimates. *Water resources research*, 48(4).
- Maurer, E. P., Wood, A. W., Adam, J. C., Lettenmaier, D. P., & Nijssen, B. (2002). A long-term hydrologically based dataset of land surface fluxes and states for the conterminous United States. *Journal of climate*, 15(22), 3237-3251.
- Save, H., S. Bettadpur, and Tapley, B.D. (2016). High resolution CSR GRACE RL05 mascons, *J. Geophys. Res. Solid Earth*, 121, doi:[10.1002/2016JB013007](https://doi.org/10.1002/2016JB013007).
- Schneider, U; Becker, A; Finger, P; Meyer-Christoffer, A; Rudolf, B; Ziese, M. (2011). GPCP Full Data Reanalysis Version 6.0 at 1.0°: Monthly Land-Surface Precipitation from Rain-Gauges built on GTS-based and Historic Data. doi: [10.5676/DWD\\_GPCP/FD\\_M\\_V7\\_100](https://doi.org/10.5676/DWD_GPCP/FD_M_V7_100)
- Swenson, S. C. (2012). GRACE monthly land water mass grids NETCDF RELEASE 5.0. *Physical Oceanography Distributed Active Archive Center (PO. DAAC), California*, doi: 10.5067/TELND-NC005.
- Wiese, D.N. (2015). GRACE monthly global water mass grids NETCDF RELEASE 5.0. Ver. 5.0. PO.DAAC, CA, USA. Dataset accessed [2017-03-18]. doi: [10.5067/TEMSC-OCL05](https://doi.org/10.5067/TEMSC-OCL05).
- Xia, Y., et al. (2012), NCEP/EMC(2009), NLDAS Secondary Forcing Data L4 Hourly 0.125 x 0.125 degree V002, Greenbelt, Maryland, USA, Goddard Earth Sciences Data and Information Services Center (GES DISC). Dataset accessed [2018-03-01]. doi: [10.5067/KCHJL8HHDP40](https://doi.org/10.5067/KCHJL8HHDP40).
